# Supplementary material for: Comparison of imaging-based single-cell resolution spatial transcriptomics profiling platforms using formalin-fixed, paraffin-embedded tumor samples
Source: Research Square preprint supplement (doi:10.21203/rs.3.rs-5656204/v1), 2025-01-16
Supplement: Supplementary file [file 2f0feebb2c948e0ed6bc2ce5.pdf]

Patient1

Patient 2

Patient 3

a

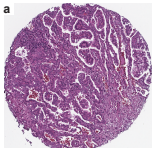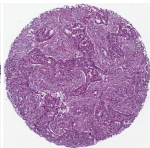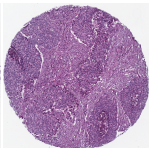

b

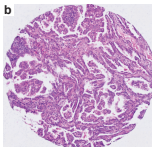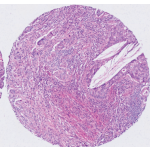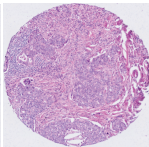

c

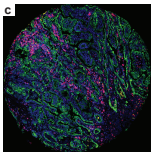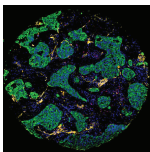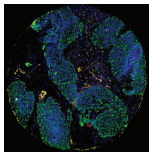

### Supplementary Figure 3: Strategy of pathologists' evaluation on ICON2.

Microphotographs showing H&E (a), reference H&E, (b) Xenium-MM H&E staining slides, (c) multiplex immunofluorescence stained with CK (green), CD3 (red) and CD68 (yellow) performed in a serial sections. We evaluated the pattern of expression of endothelial cells, fibroblasts, macrophages, plasma cells, T cells and epithelial cells, and compared them with the patterns of the phenotypes obtained for each platform in ICON2.
